# Supplementary material for: Insights into the effects of different acids on the formation and electrochemical properties of carbon spherules
Source: Royal Society of Chemistry journal article supplement (doi:10.1039/c5ra27329c), 2016-01-01
Supplement: c5ra27329c1.pdf [file c5ra27329c1.pdf]

## Supplementary Information

### Insight into the Effects of Different Acids on the Formations and Electrochemical Properties of Carbon Spherules

Jiao Yan, Haixia Wu, Wenzhuo Shen\* and Shouwu Guo\*

Department of Electronic Engineering, School of Electronic Information and Electrical Engineering, Shanghai Jiao Tong University, Shanghai 200240, P.R. China

Correspondence should be addressed to: wenzhuoshen@hotmail.com, swguo@sjtu.edu.cn, Tel./Fax 86-21-34206915

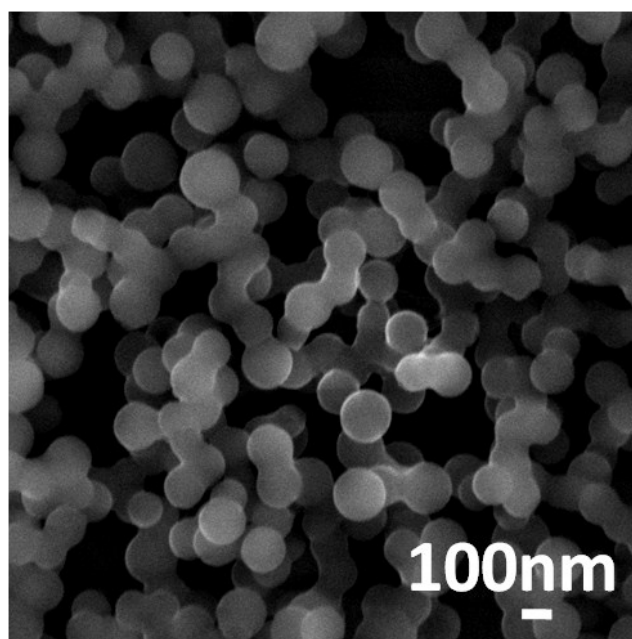

**Figure S1.** SEM image of CSs prepared through hydrothermal treatment (reaction condition: 28 mmol of glucose, 40 mL of deionized water, 5 h, 180 °C) of glucose without any mineralizer.

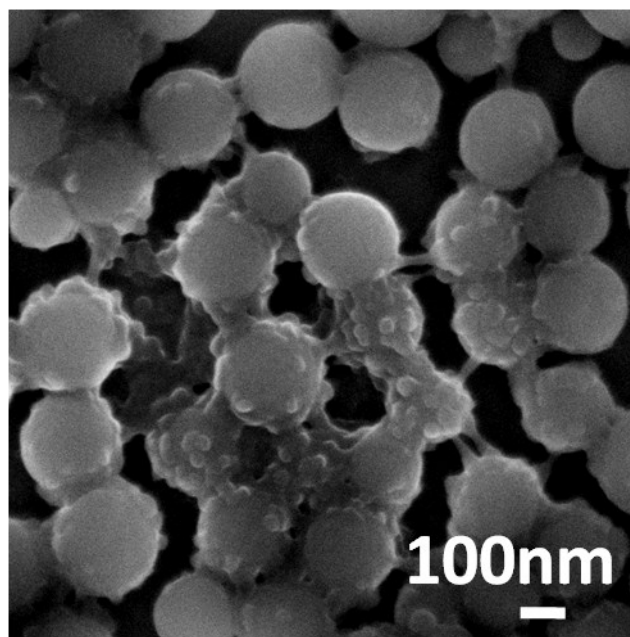

**Figure S2.** SEM image of CSs prepared through hydrothermal treatment (reaction condition: 28 mmol of glucose, 40 mL of deionized water , 2 h, 180 °C) of glucose with glutaric acid as mineralizer.

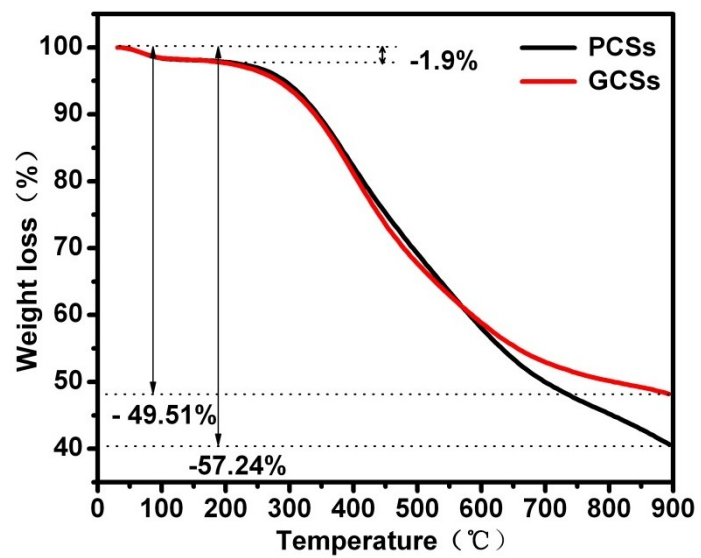

Figure S3. The TGA curves of PCSs and GCSs under N<sub>2</sub> atmosphere.

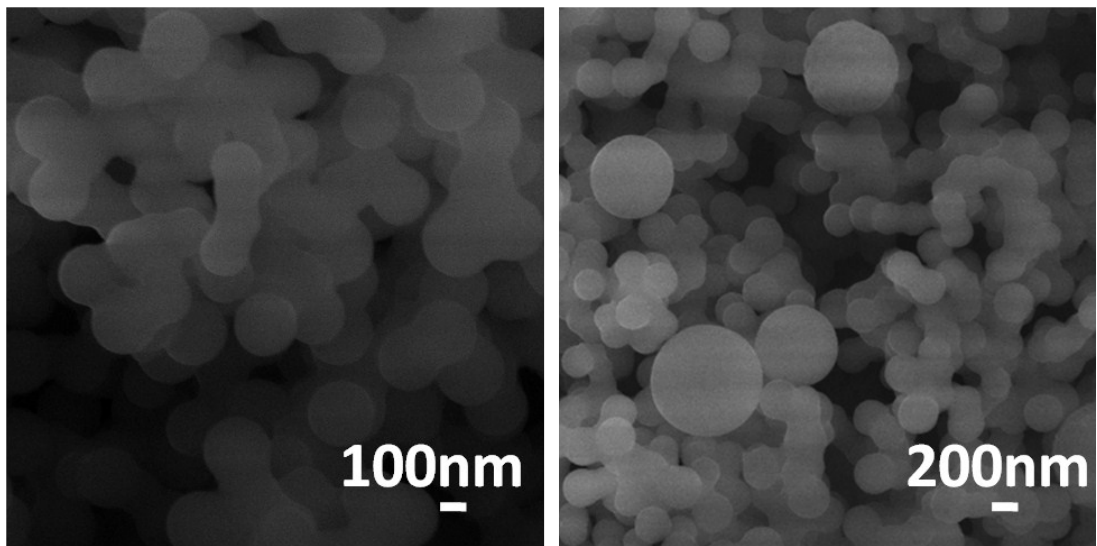

**Figure S4.** SEM images of CSs prepared through hydrothermal treatment (reaction condition: 28 mmol of glucose, 3 mmol of n-valeric acid, 40 mL of deionized water , 5 h, 180 °C) of glucose with n-valeric acid as mineralizer.

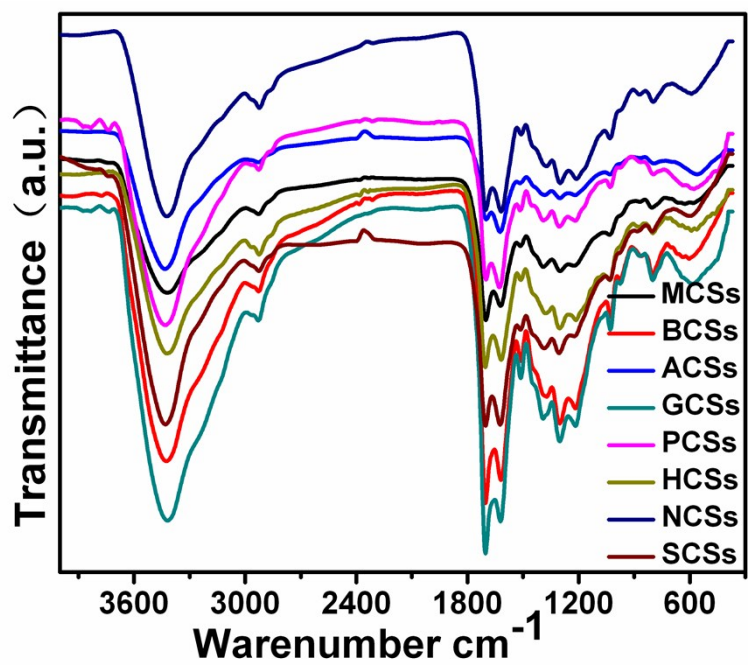

**Figure S5.** FT-IR spectra of MCSs, BCSs, ACSs, GCSs, HCSs, NCSs, SCSs and PCSs before annealing treatment.

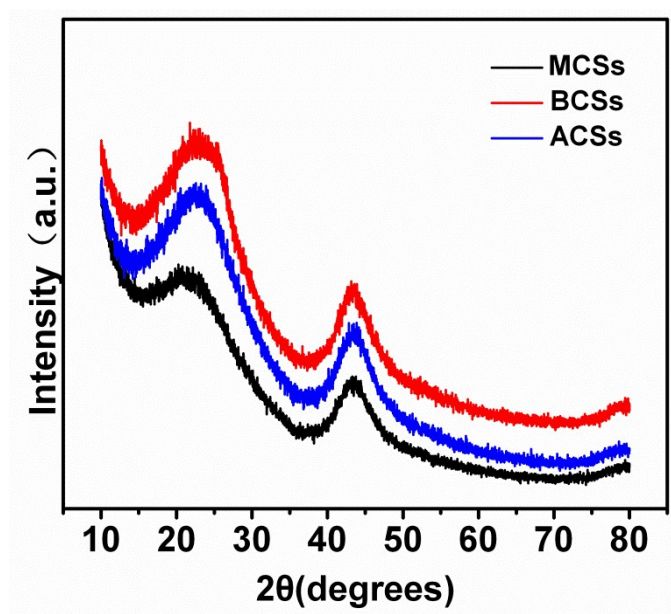

**Figure S6.** XRD patterns of MCSs, BCSs and ACSs after being annealed at 900 °C in Ar gas flow containing 5% of H<sub>2</sub> for 3 h.

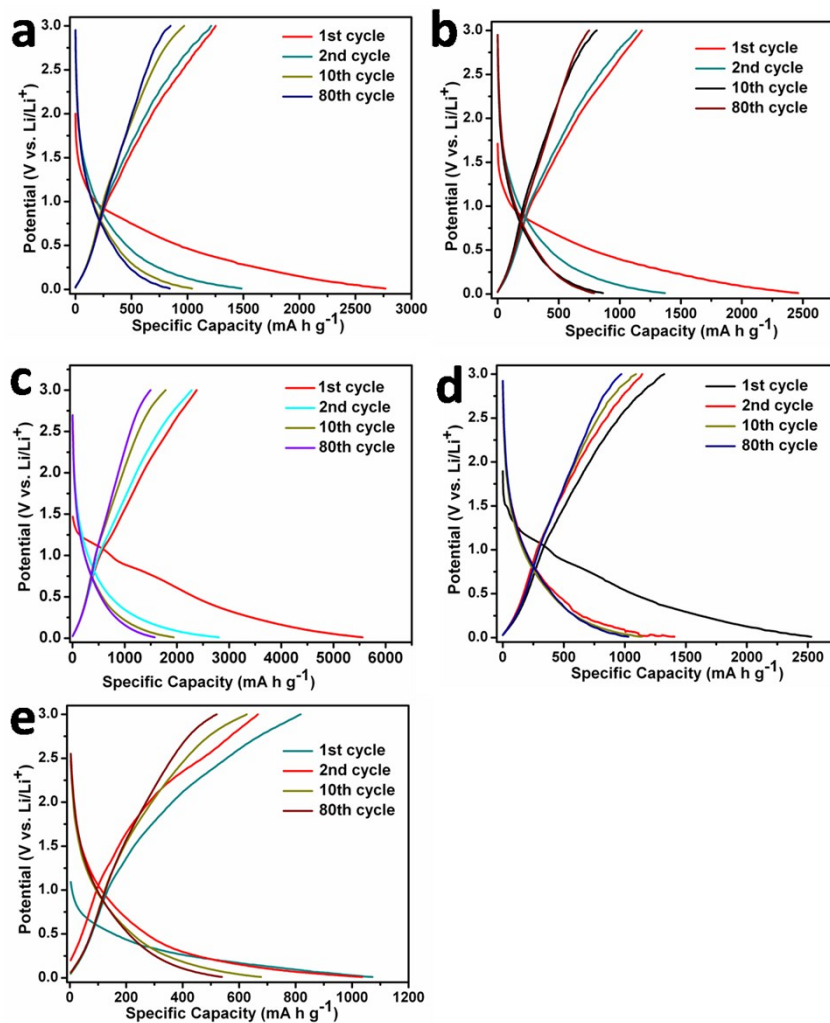

**Figure S7.** Galvanostatic charge-discharge curves of CRGO/MCSs (a), CRGO/BCSs (b), CRGO/GCSs (c), CRGO/ACSs (d) and CRGO/PCSs (e) which prepared with original GO to CSs ratio of 10:1 in weight, as anodes assessed at the current densities of  $0.2 \text{ A g}^{-1}$ .

**Table S1.** Atomic percent contents of carbon, oxygen in MCSs, BCSs, GCSs, ACSs, and PCSs before annealing treatment.

| <b>CS</b> | <b>MCSs</b> | <b>BCSs</b> | <b>GCSs</b> | <b>ACSs</b> | <b>PCSs</b> |
|-----------|-------------|-------------|-------------|-------------|-------------|
| C-atomic% | 82.6        | 78.0        | 78.4        | 79.7        | 75.0        |
| O-atomic% | 17.4        | 22.0        | 21.6        | 20.3        | 25.0        |



**Table S2.** The electrokinetic property of GCSs, PCSs, CRGO/GCSs (original GO:GCSs = 10:1, in weight) , CRGO/PCSs (original GO:PCSs = 10:1, in weight) and CRGO anodes.

| <b>Sample</b> | <b>R<sub>f</sub>(<math>\Omega</math>)</b> | <b>R<sub>ct</sub> (<math>\Omega</math>)</b> |
|---------------|-------------------------------------------|---------------------------------------------|
| CRGO/GCSs     | 80.7                                      | 53.5                                        |
| CRGO/PCSs     | 85.9                                      | 80                                          |
| CRGO          | 101                                       | 115                                         |
| GCSs          | 97.3                                      | 162                                         |
| PCSs          | 108.7                                     | 146                                         |
